# Supplementary material
Source: PubMed Central journal article supplement (PMC3988265)
Supplement: NIHMS535436-supplement-02.pdf [file NIHMS535436-supplement-02.pdf]

**Item S1.** MeSH terms specific for nephrology.

ACIDOSIS, RENAL TUBULAR  
AIDS-ASSOCIATED NEPHROPATHY  
ALBUMINURIA  
ANTI-GLOMERULAR BASEMENT MEMBRANE DISEASE  
ANURIA  
AZOTEMIA  
BACTERIURIA  
BALKAN NEPHROPATHY  
BARTTER SYNDROME  
BLOOD UREA NITROGEN  
BRANCHIO-OTO-RENAL SYNDROME  
DIABETES INSIPIDUS, NEPHROGENIC  
DIABETIC NEPHROPATHIES  
FANCONI SYNDROME  
GITELMAN SYNDROME  
GLOMERULAR FILTRATION RATE  
GLOMERULONEPHRITIS  
GLOMERULONEPHRITIS, IGA  
GLOMERULONEPHRITIS, MEMBRANOPROLIFERATIVE  
GLOMERULONEPHRITIS, MEMBRANOUS  
GLOMERULOSCLEROSIS, FOCAL SEGMENTAL  
GLYCOSURIA  
GLYCOSURIA, RENAL  
HEMATURIA  
HEMODIALYSIS, HOME  
HEMOLYTIC-UREMIC SYNDROME  
HEPATORENAL SYNDROME  
HYDRONEPHROSIS  
HYPERPARATHYROIDISM, SECONDARY  
HYPERPHOSPHATEMIA  
HYPERTENSION, RENAL  
HYPERTENSION, RENOVASCULAR  
KIDNEY CORTEX NECROSIS  
KIDNEY DISEASES  
KIDNEY DISEASES, CYSTIC  
KIDNEY FAILURE  
KIDNEY FAILURE, ACUTE  
KIDNEY FAILURE, CHRONIC  
KIDNEY FUNCTION TESTS  
KIDNEY PAPILLARY NECROSIS  
KIDNEY TRANSPLANTATION  
KIDNEY TUBULAR NECROSIS, ACUTE  
KIDNEY, ARTIFICIAL  
LUPUS NEPHRITIS

MEDULLARY SPONGE KIDNEY  
MULTICYSTIC DYSPLASTIC KIDNEY  
NEPHRECTOMY  
NEPHRITIS  
NEPHRITIS, HEREDITARY  
NEPHRITIS, INTERSTITIAL  
NEPHROCALCINOSIS  
NEPHROGENIC FIBROSING DERMOPATHY  
NEPHROSCLEROSIS  
NEPHROSIS  
NEPHROSIS, LIPOID  
NEPHROTIC SYNDROME  
PERINEPHRITIS  
PERITONEAL DIALYSIS  
PERITONEAL DIALYSIS, CONTINUOUS AMBULATORY  
POLYCYSTIC KIDNEY DISEASES  
POLYCYSTIC KIDNEY, AUTOSOMAL DOMINANT  
POLYCYSTIC KIDNEY, AUTOSOMAL RECESSIVE  
PROTEINURIA  
PSEUDOHYPOALDOSTERONISM  
PURPURA, SCHOENLEIN-HENOCH  
PYELITIS  
PYELOCYSTITIS  
PYELONEPHRITIS  
PYELONEPHRITIS, XANTHOGRANULOMATOUS  
PYONEPHROSIS  
PYURIA  
RENAL ARTERY OBSTRUCTION  
RENAL DIALYSIS  
RENAL INSUFFICIENCY  
RENAL INSUFFICIENCY, ACUTE  
RENAL INSUFFICIENCY, CHRONIC  
RENAL OSTEODYSTROPHY  
RENAL REPLACEMENT THERAPY  
RENAL TUBULAR TRANSPORT, INBORN ERRORS  
TUBERCULOSIS, RENAL  
UREMIA  
URINALYSIS  
WEGENER GRANULOMATOSIS
