# Supplementary material
Source: PubMed Central journal article supplement (PMC3988265)
Supplement: NIHMS535436-supplement-03.pdf [file NIHMS535436-supplement-03.pdf]

Item S2. Supplementary Tables

Table a. Attributes of interventional clinical trials from ClinicalTrials.gov: October 1, 2007, through September 27, 2010

| Trial attribute          | CKD<br>N=308 | ESRD/CKD<br>on dialysis<br>N=299 | Renal<br>transplant<br>N=194 | Glomerular<br>disease<br>N=86 | Neoplastic<br>N=12 | AKI<br>N=84 | Metabolic/el<br>ectrolyte<br>disorders<br>N=3 | Nehprolithia<br>sis<br>N=14 | Pyelonephri<br>tis<br>N=7 | Care<br>delivery<br>models<br>N=5 | Other <sup>a</sup><br>N=56 |
|--------------------------|--------------|----------------------------------|------------------------------|-------------------------------|--------------------|-------------|-----------------------------------------------|-----------------------------|---------------------------|-----------------------------------|----------------------------|
| Primary purpose          | n=289        | n=282                            | n=188                        | n=85                          | n=11               | n=79        | n=3                                           | n=14                        | n=7                       | n=4                               | n=54                       |
| Treatment                | 231 (79.9)   | 218 (77.3)                       | 140 (74.5)                   | 81 (95.3)                     | 9 (81.8)           | 35 (44.3)   | 1 (33.3)                                      | 12 (85.7)                   | 7 (100.0)                 | 0 (0.0)                           | 29 (53.7)                  |
| Prevention               | 29 (10.0)    | 32 (11.3)                        | 36 (19.1)                    | 3 (3.5)                       | 1 (9.1)            | 39 (49.4)   | 1 (33.3)                                      | 0 (0.0)                     | 0 (0.0)                   | 1 (25.0)                          | 18 (33.3)                  |
| Diagnostic               | 5 (1.7)      | 5 (1.8)                          | 5 (2.7)                      | 0 (0.0)                       | 0 (0.0)            | 4 (5.1)     | 1 (33.3)                                      | 1 (7.1)                     | 0 (0.0)                   | 1 (25.0)                          | 1 (1.9)                    |
| Supportive care          | 5 (1.7)      | 11 (3.9)                         | 3 (1.6)                      | 1 (1.2)                       | 1 (9.1)            | 0 (0.0)     | 0 (0.0)                                       | 1 (7.1)                     | 0 (0.0)                   | 0 (0.0)                           | 1 (1.9)                    |
| Screening                | 1 (0.3)      | 0 (0.0)                          | 0 (0.0)                      | 0 (0.0)                       | 0 (0.0)            | 0 (0.0)     | 0 (0.0)                                       | 0 (0.0)                     | 0 (0.0)                   | 0 (0.0)                           | 2 (3.7)                    |
| Health services research | 5 (1.7)      | 6 (2.1)                          | 1 (0.5)                      | 0 (0.0)                       | 0 (0.0)            | 0 (0.0)     | 0 (0.0)                                       | 0 (0.0)                     | 0 (0.0)                   | 2 (50.0)                          | 0 (0.0)                    |
| Basic science            | 13 (4.5)     | 10 (3.5)                         | 3 (1.6)                      | 0 (0.0)                       | 0 (0.0)            | 1 (1.3)     | 0 (0.0)                                       | 0 (0.0)                     | 0 (0.0)                   | 0 (0.0)                           | 3 (5.6)                    |
| Phase                    | n=308        | n=299                            | n=194                        | n=86                          | n=12               | n=84        | n=3                                           | n=14                        | n=7                       | n=5                               | n=56                       |
| 0                        | 0 (0.0)      | 1 (0.3)                          | 1 (0.5)                      | 0 (0.0)                       | 0 (0.0)            | 1 (1.2)     | 0 (0.0)                                       | 0 (0.0)                     | 0 (0.0)                   | 0 (0.0)                           | 0 (0.0)                    |
| II                       | 46 (14.9)    | 15 (5.0)                         | 9 (4.6)                      | 9 (10.5)                      | 1 (8.3)            | 2 (2.4)     | 0 (0.0)                                       | 0 (0.0)                     | 1 (14.3)                  | 1 (20.0)                          | 15 (26.8)                  |
| I/II                     | 7 (2.3)      | 9 (3.0)                          | 15 (7.7)                     | 4 (4.7)                       | 0 (0.0)            | 1 (1.2)     | 1 (33.3)                                      | 1 (7.1)                     | 0 (0.0)                   | 0 (0.0)                           | 1 (1.8)                    |
| II                       | 48 (15.6)    | 56 (18.7)                        | 25 (12.9)                    | 18 (20.9)                     | 5 (41.7)           | 6 (7.1)     | 1 (33.3)                                      | 2 (14.3)                    | 2 (28.6)                  | 0 (0.0)                           | 12 (21.4)                  |
| II/III                   | 13 (4.2)     | 9 (3.0)                          | 7 (3.6)                      | 4 (4.7)                       | 0 (0.0)            | 9 (10.7)    | 0 (0.0)                                       | 0 (0.0)                     | 0 (0.0)                   | 0 (0.0)                           | 2 (3.6)                    |
| III                      | 55 (17.9)    | 54 (18.1)                        | 22 (11.3)                    | 19 (22.1)                     | 1 (8.3)            | 15 (17.9)   | 0 (0.0)                                       | 2 (14.3)                    | 2 (28.6)                  | 1 (20.0)                          | 6 (10.7)                   |
| IV                       | 66 (21.4)    | 64 (21.4)                        | 71 (36.6)                    | 17 (19.8)                     | 0 (0.0)            | 29 (34.5)   | 0 (0.0)                                       | 1 (7.1)                     | 1 (14.3)                  | 0 (0.0)                           | 9 (16.1)                   |
| N/A                      | 73 (23.7)    | 91 (30.4)                        | 44 (22.7)                    | 15 (17.4)                     | 5 (41.7)           | 21 (25.0)   | 1 (33.3)                                      | 8 (57.1)                    | 1 (14.3)                  | 3 (60.0)                          | 11 (19.6)                  |
| Allocation               | n=303        | n=292                            | n=189                        | n=86                          | n=11               | n=84        | n=3                                           | n=14                        | n=7                       | n=5                               | n=55                       |
| Randomized               | 216 (71.3)   | 207 (70.9)                       | 138 (73.0)                   | 44 (51.2)                     | 6 (54.5)           | 76 (90.5)   | 2 (66.7)                                      | 11 (78.6)                   | 6 (85.7)                  | 4 (80.0)                          | 47 (85.5)                  |
| Non-randomized           | 87 (28.7)    | 85 (29.1)                        | 51 (27.0)                    | 42 (48.8)                     | 5 (45.5)           | 8 (9.5)     | 1 (33.3)                                      | 3 (21.4)                    | 1 (14.3)                  | 1 (20.0)                          | 8 (14.5)                   |
| Intervention model       | n=307        | n=296                            | n=194                        | n=86                          | n=10               | n=83        | n=3                                           | n=14                        | n=7                       | n=5                               | n=55                       |
| Single group             | 72 (23.5)    | 74 (25.0)                        | 49 (25.3)                    | 42 (48.8)                     | 4 (40.0)           | 9 (10.8)    | 1 (33.3)                                      | 2 (14.3)                    | 1 (14.3)                  | 2 (40.0)                          | 7 (12.7)                   |
| Parallel                 | 201 (65.5)   | 174 (58.8)                       | 131 (67.5)                   | 40 (46.5)                     | 6 (60.0)           | 65 (78.3)   | 1 (33.3)                                      | 11 (78.6)                   | 6 (85.7)                  | 3 (60.0)                          | 41 (74.5)                  |
| Crossover                | 31 (10.1)    | 44 (14.9)                        | 6 (3.1)                      | 3 (3.5)                       | 0 (0.0)            | 7 (8.4)     | 1 (33.3)                                      | 0 (0.0)                     | 0 (0.0)                   | 0 (0.0)                           | 7 (12.7)                   |
| Factorial                | 3 (1.0)      | 4 (1.4)                          | 8 (4.1)                      | 1 (1.2)                       | 0 (0.0)            | 2 (2.4)     | 0 (0.0)                                       | 1 (7.1)                     | 0 (0.0)                   | 0 (0.0)                           | 0 (0.0)                    |
| Masking                  | n=307        | n=296                            | n=194                        | n=86                          | n=10               | n=84        | n=3                                           | n=14                        | n=7                       | n=5                               | n=56                       |
| Open                     | 175 (57.0)   | 209 (70.6)                       | 160 (82.5)                   | 73 (84.9)                     | 8 (80.0)           | 42 (50.0)   | 2 (66.7)                                      | 5 (35.7)                    | 2 (28.6)                  | 4 (80.0)                          | 23 (41.1)                  |
| Single blind             | 28 (9.1)     | 23 (7.8)                         | 6 (3.1)                      | 2 (2.3)                       | 0 (0.0)            | 11 (13.1)   | 0 (0.0)                                       | 3 (21.4)                    | 1 (14.3)                  | 1 (20.0)                          | 6 (10.7)                   |
| Double blind             | 104 (33.9)   | 64 (21.6)                        | 28 (14.4)                    | 11 (12.8)                     | 2 (20.0)           | 31 (36.9)   | 1 (33.3)                                      | 6 (42.9)                    | 4 (57.1)                  | 0 (0.0)                           | 27 (48.2)                  |

Values are n (%). Columns are not mutually exclusive; a study may be counted in more than one column.

<sup>a</sup>Other includes drug studies, pharmacokinetic studies, and studies with other interventions with renal endpoints. Abbreviations: AKI, acute kidney infection; CKD, chronic kidney disease; ESRD, end-stage renal disease.

Table b. Enrollment and endpoint classification

| Trial attribute                              | CKD<br>N=308     | ESRD/CKD<br>on dialysis<br>N=299 | Renal<br>transplant<br>N=194 | Glomerular<br>disease<br>N=86 | Neoplastic<br>N=12 | AKI<br>N=84  | Metabolic/el<br>ectrolyte<br>disorders<br>N=3 | Nehprolithia<br>sis<br>N=14 | Pyelonephri<br>tis<br>N=7 | Care<br>delivery<br>models<br>N=5 | Other <sup>a</sup><br>N=56 |
|----------------------------------------------|------------------|----------------------------------|------------------------------|-------------------------------|--------------------|--------------|-----------------------------------------------|-----------------------------|---------------------------|-----------------------------------|----------------------------|
| Enrollment                                   | n=304            | n=293                            | n=194                        | n=85                          | n=12               | n=83         | n=3                                           | n=14                        | n=7                       | n=5                               | n=55                       |
| Mean (SD)                                    | 257 (1070)       | 131 (225)                        | 122 (154)                    | 82 (118)                      | 71 (72)            | 280 (448)    | 55 (48)                                       | 117 (84)                    | 152 (104)                 | 209 (171)                         | 193 (476)                  |
| Median (IQR)                                 | 69 (32-161)      | 62 (26-144)                      | 69 (30-152)                  | 30 (20-100)                   | 50 (33-85)         | 150 (45-368) | 50 (10-105)                                   | 90 (54-200)                 | 140 (50-225)              | 140 (140-210)                     | 60 (30-126)                |
| Patient enrollment                           | n=304            | n=293                            | n=194                        | n=85                          | n=12               | n=83         | n=3                                           | n=14                        | n=7                       | n=5                               | n=55                       |
| 0                                            | 2 (0.7)          | 0 (0.0)                          | 1 (0.5)                      | 0 (0.0)                       | 0 (0.0)            | 1 (1.2)      | 0 (0.0)                                       | 0 (0.0)                     | 0 (0.0)                   | 0 (0.0)                           | 0 (0.0)                    |
| 1-10                                         | 9 (3.0)          | 19 (6.5)                         | 13 (6.7)                     | 8 (9.4)                       | 1 (8.3)            | 3 (3.6)      | 1 (33.3)                                      | 1 (7.1)                     | 1 (14.3)                  | 0 (0.0)                           | 3 (5.5)                    |
| 11-50                                        | 116 (38.2)       | 107 (36.5)                       | 65 (33.5)                    | 45 (52.9)                     | 6 (50.0)           | 17 (20.5)    | 1 (33.3)                                      | 2 (14.3)                    | 1 (14.3)                  | 0 (0.0)                           | 23 (41.8)                  |
| 51-100                                       | 70 (23.0)        | 69 (23.5)                        | 45 (23.2)                    | 11 (12.9)                     | 4 (33.3)           | 17 (20.5)    | 0 (0.0)                                       | 5 (35.7)                    | 0 (0.0)                   | 1 (20.0)                          | 13 (23.6)                  |
| 101-500                                      | 83 (27.3)        | 85 (29.0)                        | 64 (33.0)                    | 20 (23.5)                     | 1 (8.3)            | 34 (41.0)    | 1 (33.3)                                      | 6 (42.9)                    | 5 (71.4)                  | 4 (80.0)                          | 11 (20.0)                  |
| 501-1000                                     | 15 (4.9)         | 10 (3.4)                         | 5 (2.6)                      | 1 (1.2)                       | 0 (0.0)            | 8 (9.6)      | 0 (0.0)                                       | 0 (0.0)                     | 0 (0.0)                   | 0 (0.0)                           | 3 (5.5)                    |
| >1000                                        | 9 (3.0)          | 3 (1.0)                          | 1 (0.5)                      | 0 (0.0)                       | 0 (0.0)            | 3 (3.6)      | 0 (0.0)                                       | 0 (0.0)                     | 0 (0.0)                   | 0 (0.0)                           | 2 (3.6)                    |
| Study duration (months)                      | n=280            | n=275                            | n=174                        | n=82                          | n=11               | n=81         | n=3                                           | n=13                        | n=7                       | n=4                               | n=52                       |
| Mean (SD)                                    | 23 (19)          | 21 (16)                          | 34 (24)                      | 31 (22)                       | 44 (38)            | 23 (15)      | 19 (16)                                       | 17 (11)                     | 31 (39)                   | 31 (24)                           | 21 (18)                    |
| Median (IQR)                                 | 19 (12-31)       | 17 (9-28)                        | 27 (18-46)                   | 25 (16-37)                    | 37 (13-61)         | 18 (13-28)   | 13 (8-37)                                     | 19 (5-24)                   | 12 (9-37)                 | 28 (11-51)                        | 16 (9-25)                  |
| Endpoint classification                      | n=267            | n=255                            | n=166                        | n=78                          | n=11               | n=68         | n=2                                           | n=12                        | n=7                       | n=4                               | n=49                       |
| Safety                                       | 21 (7.9)         | 10 (3.9)                         | 7 (4.2)                      | 5 (6.4)                       | 0 (0.0)            | 4 (5.9)      | 0 (0.0)                                       | 0 (0.0)                     | 0 (0.0)                   | 0 (0.0)                           | 7 (14.3)                   |
| Efficacy                                     | 84 (31.5)        | 83 (32.5)                        | 45 (27.1)                    | 27 (34.6)                     | 4 (36.4)           | 33 (48.5)    | 0 (0.0)                                       | 8 (66.7)                    | 4 (57.1)                  | 3 (75.0)                          | 14 (28.6)                  |
| Safety/efficacy                              | 117 (43.8)       | 132 (51.8)                       | 102 (61.4)                   | 45 (57.7)                     | 5 (45.5)           | 26 (38.2)    | 2 (100.0)                                     | 3 (25.0)                    | 3 (42.9)                  | 1 (25.0)                          | 18 (36.7)                  |
| Bio-equivalence                              | 1 (0.4)          | 2 (0.8)                          | 1 (0.6)                      | 0 (0.0)                       | 0 (0.0)            | 1 (1.5)      | 0 (0.0)                                       | 0 (0.0)                     | 0 (0.0)                   | 0 (0.0)                           | 4 (8.2)                    |
| Bio-availability                             | 0 (0.0)          | 1 (0.4)                          | 2 (1.2)                      | 0 (0.0)                       | 0 (0.0)            | 0 (0.0)      | 0 (0.0)                                       | 0 (0.0)                     | 0 (0.0)                   | 0 (0.0)                           | 0 (0.0)                    |
| Pharmacokinetics                             | 29 (10.9)        | 20 (7.8)                         | 8 (4.8)                      | 0 (0.0)                       | 2 (18.2)           | 2 (2.9)      | 0 (0.0)                                       | 1 (8.3)                     | 0 (0.0)                   | 0 (0.0)                           | 1 (2.0)                    |
| Pharmacodynamics                             | 7 (2.6)          | 2 (0.8)                          | 1 (0.6)                      | 0 (0.0)                       | 0 (0.0)            | 0 (0.0)      | 0 (0.0)                                       | 0 (0.0)                     | 0 (0.0)                   | 0 (0.0)                           | 2 (4.1)                    |
| Pharmacokinetics/dynamics                    | 8 (3.0)          | 5 (2.0)                          | 0 (0.0)                      | 1 (1.3)                       | 0 (0.0)            | 2 (2.9)      | 0 (0.0)                                       | 0 (0.0)                     | 0 (0.0)                   | 0 (0.0)                           | 3 (6.1)                    |
| Missing, n/N (%)                             | 41/308<br>(13.3) | 44/299<br>(14.7)                 | 28/194<br>(14.4)             | 8/86 (9.3)                    | 1/12 (8.3)         | 16/84 (19.0) | 1/3 (33.3)                                    | 2/14 (14.3)                 | 0/7 (0.0)                 | 1/5 (20.0)                        | 7/56 (12.5)                |
| Number of primary outcomes measured          | n=304            | n=294                            | n=191                        | n=86                          | n=11               | n=81         | n=3                                           | n=14                        | n=7                       | n=5                               | n=56                       |
| Mean (SD)                                    | 1.2 (0.69)       | 1.2 (0.78)                       | 1.2 (0.77)                   | 1.2 (1.11)                    | 1.2 (0.40)         | 1.2 (0.73)   | 1.0 (0.00)                                    | 1.1 (0.27)                  | 1.0 (0.00)                | 1.0 (0.00)                        | 1.2 (0.62)                 |
| Median (IQR)                                 | 1 (1.0-1.0)      | 1 (1.0-1.0)                      | 1 (1.0-1.0)                  | 1 (1.0-1.0)                   | 1 (1.0-1.0)        | 1 (1.0-1.0)  | 1 (1.0-1.0)                                   | 1 (1.0-1.0)                 | 1 (1.0-1.0)               | 1 (1.0-1.0)                       | 1 (1.0-1.0)                |
| A primary outcome measures safety, n/N (%)   | 87/286<br>(30.4) | 89/284<br>(31.3)                 | 61/181<br>(33.7)             | 39/83 (47.0)                  | 2/11 (18.2)        | 35/81 (43.2) | 2/3 (66.7)                                    | 2/13 (15.4)                 | 2/7 (28.6)                | 0/5 (0.0)                         | 20/54 (37.0)               |
| Number of secondary outcomes measured        | n=304            | n=294                            | n=192                        | n=86                          | n=11               | n=81         | n=3                                           | n=14                        | n=7                       | n=5                               | n=56                       |
| Mean (SD)                                    | 2.3 (3.21)       | 2.2 (2.57)                       | 2.8 (3.66)                   | 1.9 (1.71)                    | 2.0 (2.00)         | 2.0 (2.26)   | 0.7 (0.58)                                    | 1.4 (1.50)                  | 1.9 (1.95)                | 1.4 (0.89)                        | 1.8 (2.09)                 |
| Median (IQR)                                 | 1 (1.0-3.0)      | 1 (1.0-3.0)                      | 1 (1.0-4.0)                  | 1 (1.0-3.0)                   | 1 (1.0-3.0)        | 1 (0.0-3.0)  | 1 (0.0-1.0)                                   | 1 (0.0-3.0)                 | 1 (1.0-2.0)               | 1 (1.0-1.0)                       | 1 (0.5-2.5)                |
| A secondary outcome measures safety, n/N (%) | 93/291<br>(32.0) | 94/284<br>(33.1)                 | 79/185<br>(42.7)             | 44/83 (53.0)                  | 2/11 (18.2)        | 35/81 (43.2) | 2/3 (66.7)                                    | 1/14 (7.1)                  | 3/7 (42.9)                | 0/5 (0.0)                         | 14/54 (25.9)               |

Unless otherwise noted, values are n (%). Columns are not mutually exclusive; a study may be counted in more than one column.

<sup>a</sup>Other includes drug studies, pharmacokinetic studies, and studies with other interventions with renal endpoints.

Abbreviations: AKI, acute kidney infection; CKD, chronic kidney disease; ESRD, end-stage renal disease; IQR, interquartile range; SD, standard deviation.

**Table c. Study arms, interventions, patient eligibility, and monitoring**

| Trial attribute                        | CKD<br>N=308     | ESRD/CKD<br>on dialysis<br>N=299 | Renal<br>transplant<br>N=194 | Glomerular<br>disease<br>N=86 | Neoplastic<br>N=12 | AKI<br>N=84 | Metabolic/el<br>ectrolyte<br>disorders<br>N=3 | Nehprolithia<br>sis<br>N=14 | Pyelonephri<br>tis<br>N=7 | Care<br>delivery<br>models<br>N=5 | Other <sup>a</sup><br>N=56 |
|----------------------------------------|------------------|----------------------------------|------------------------------|-------------------------------|--------------------|-------------|-----------------------------------------------|-----------------------------|---------------------------|-----------------------------------|----------------------------|
| Number of arms                         | n=294            | n=288                            | n=190                        | n=86                          | n=11               | n=83        | n=3                                           | n=14                        | n=7                       | n=5                               | n=53                       |
| 1                                      | 70 (23.8)        | 73 (25.3)                        | 47 (24.7)                    | 43 (50.0)                     | 5 (45.5)           | 8 (9.6)     | 1 (33.3)                                      | 2 (14.3)                    | 1 (14.3)                  | 2 (40.0)                          | 9 (17.0)                   |
| 2                                      | 152 (51.7)       | 162 (56.3)                       | 113 (59.5)                   | 36 (41.9)                     | 5 (45.5)           | 63 (75.9)   | 1 (33.3)                                      | 9 (64.3)                    | 5 (71.4)                  | 3 (60.0)                          | 36 (67.9)                  |
| 3                                      | 39 (13.3)        | 23 (8.0)                         | 19 (10.0)                    | 5 (5.8)                       | 0 (0.0)            | 7 (8.4)     | 0 (0.0)                                       | 2 (14.3)                    | 1 (14.3)                  | 0 (0.0)                           | 4 (7.5)                    |
| 4                                      | 21 (7.1)         | 15 (5.2)                         | 10 (5.3)                     | 2 (2.3)                       | 1 (9.1)            | 5 (6.0)     | 0 (0.0)                                       | 1 (7.1)                     | 0 (0.0)                   | 0 (0.0)                           | 1 (1.9)                    |
| 5 or more                              | 12 (4.1)         | 15 (5.2)                         | 1 (0.5)                      | 0 (0.0)                       | 0 (0.0)            | 0 (0.0)     | 1 (33.3)                                      | 0 (0.0)                     | 0 (0.0)                   | 0 (0.0)                           | 3 (5.7)                    |
| Arm types <sup>b</sup>                 | n=285            | n=272                            | n=172                        | n=76                          | n=8                | n=79        | n=3                                           | n=13                        | n=7                       | n=4                               | n=52                       |
| Active comparator                      | 126 (44.2)       | 143 (52.6)                       | 100 (58.1)                   | 31 (40.8)                     | 6 (75.0)           | 50 (63.3)   | 1 (33.3)                                      | 7 (53.8)                    | 6 (85.7)                  | 0 (0.0)                           | 22 (42.3)                  |
| No-intervention                        | 25 (8.8)         | 30 (11.0)                        | 22 (12.8)                    | 1 (1.3)                       | 0 (0.0)            | 6 (7.6)     | 0 (0.0)                                       | 1 (7.7)                     | 0 (0.0)                   | 2 (50.0)                          | 6 (11.5)                   |
| Experimental                           | 194 (68.1)       | 205 (75.4)                       | 122 (70.9)                   | 62 (81.6)                     | 5 (62.5)           | 49 (62.0)   | 2 (66.7)                                      | 9 (69.2)                    | 4 (57.1)                  | 3 (75.0)                          | 35 (67.3)                  |
| Placebo comparator                     | 90 (31.6)        | 50 (18.4)                        | 20 (11.6)                    | 10 (13.2)                     | 3 (37.5)           | 24 (30.4)   | 1 (33.3)                                      | 5 (38.5)                    | 2 (28.6)                  | 0 (0.0)                           | 24 (46.2)                  |
| Sham comparator                        | 3 (1.1)          | 1 (0.4)                          | 2 (1.2)                      | 0 (0.0)                       | 0 (0.0)            | 0 (0.0)     | 0 (0.0)                                       | 0 (0.0)                     | 0 (0.0)                   | 0 (0.0)                           | 0 (0.0)                    |
| Other                                  | 13 (4.6)         | 15 (5.5)                         | 11 (6.4)                     | 5 (6.6)                       | 0 (0.0)            | 3 (3.8)     | 0 (0.0)                                       | 0 (0.0)                     | 0 (0.0)                   | 1 (25.0)                          | 6 (11.5)                   |
| Intervention types(b)                  | n=308            | n=299                            | n=194                        | n=86                          | n=12               | n=84        | n=3                                           | n=14                        | n=7                       | n=5                               | n=56                       |
| Drug                                   | 242 (78.6)       | 163 (54.5)                       | 157 (80.9)                   | 82 (95.3)                     | 8 (66.7)           | 60 (71.4)   | 3 (100.0)                                     | 8 (57.1)                    | 6 (85.7)                  | 0 (0.0)                           | 42 (75.0)                  |
| Procedure                              | 14 (4.5)         | 37 (12.4)                        | 21 (10.8)                    | 2 (2.3)                       | 3 (25.0)           | 12 (14.3)   | 0 (0.0)                                       | 0 (0.0)                     | 0 (0.0)                   | 0 (0.0)                           | 3 (5.4)                    |
| Biologic or vaccine                    | 3 (1.0)          | 13 (4.3)                         | 13 (6.7)                     | 4 (4.7)                       | 1 (8.3)            | 0 (0.0)     | 0 (0.0)                                       | 0 (0.0)                     | 0 (0.0)                   | 0 (0.0)                           | 4 (7.1)                    |
| Behavior                               | 20 (6.5)         | 13 (4.3)                         | 1 (0.5)                      | 0 (0.0)                       | 0 (0.0)            | 0 (0.0)     | 0 (0.0)                                       | 0 (0.0)                     | 0 (0.0)                   | 2 (40.0)                          | 0 (0.0)                    |
| Device                                 | 12 (3.9)         | 42 (14.0)                        | 1 (0.5)                      | 0 (0.0)                       | 3 (25.0)           | 10 (11.9)   | 0 (0.0)                                       | 5 (35.7)                    | 0 (0.0)                   | 0 (0.0)                           | 3 (5.4)                    |
| Radiation                              | 1 (0.3)          | 0 (0.0)                          | 2 (1.0)                      | 0 (0.0)                       | 1 (8.3)            | 0 (0.0)     | 0 (0.0)                                       | 0 (0.0)                     | 0 (0.0)                   | 0 (0.0)                           | 0 (0.0)                    |
| Dietary supplement                     | 14 (4.5)         | 16 (5.4)                         | 3 (1.5)                      | 1 (1.2)                       | 0 (0.0)            | 0 (0.0)     | 0 (0.0)                                       | 0 (0.0)                     | 1 (14.3)                  | 0 (0.0)                           | 2 (3.6)                    |
| Genetic                                | 0 (0.0)          | 0 (0.0)                          | 0 (0.0)                      | 0 (0.0)                       | 0 (0.0)            | 0 (0.0)     | 0 (0.0)                                       | 0 (0.0)                     | 0 (0.0)                   | 0 (0.0)                           | 0 (0.0)                    |
| Other                                  | 23 (7.5)         | 38 (12.7)                        | 8 (4.1)                      | 2 (2.3)                       | 1 (8.3)            | 6 (7.1)     | 0 (0.0)                                       | 1 (7.1)                     | 1 (14.3)                  | 3 (60.0)                          | 6 (10.7)                   |
| Sex of participants                    | n=308            | n=299                            | n=194                        | n=86                          | n=12               | n=84        | n=3                                           | n=14                        | n=7                       | n=5                               | n=56                       |
| Female                                 | 3 (1.0)          | 1 (0.3)                          | 0 (0.0)                      | 0 (0.0)                       | 0 (0.0)            | 0 (0.0)     | 0 (0.0)                                       | 0 (0.0)                     | 2 (28.6)                  | 0 (0.0)                           | 0 (0.0)                    |
| Male                                   | 2 (0.6)          | 1 (0.3)                          | 0 (0.0)                      | 0 (0.0)                       | 0 (0.0)            | 1 (1.2)     | 0 (0.0)                                       | 0 (0.0)                     | 0 (0.0)                   | 0 (0.0)                           | 5 (8.9)                    |
| Both                                   | 303 (98.4)       | 297 (99.3)                       | 194 (100.0)                  | 86 (100.0)                    | 12 (100.0)         | 83 (98.8)   | 3 (100.0)                                     | 14 (100.0)                  | 5 (71.4)                  | 5 (100.0)                         | 51 (91.1)                  |
| Accepts healthy volunteers,<br>n/N (%) | 49/304<br>(16.1) | 16/294 (5.4)                     | 10/192 (5.2)                 | 3/86 (3.5)                    | 0/12 (0.0)         | 5/84 (6.0)  | 0/3 (0.0)                                     | 3/14 (21.4)                 | 0/7 (0.0)                 | 0/5 (0.0)                         | 17/56 (30.4)               |
| Age restrictions <sup>b</sup>          | n=308            | n=299                            | n=194                        | n=86                          | n=12               | n=84        | n=3                                           | n=14                        | n=7                       | n=5                               | n=56                       |
| Max age of ≤18                         | 5 (1.6)          | 5 (1.7)                          | 2 (1.0)                      | 6 (7.0)                       | 0 (0.0)            | 1 (1.2)     | 0 (0.0)                                       | 0 (0.0)                     | 4 (57.1)                  | 1 (20.0)                          | 3 (5.4)                    |
| Min age of ≥65                         | 2 (0.6)          | 1 (0.3)                          | 2 (1.0)                      | 0 (0.0)                       | 0 (0.0)            | 0 (0.0)     | 0 (0.0)                                       | 0 (0.0)                     | 0 (0.0)                   | 0 (0.0)                           | 0 (0.0)                    |
| Excludes ages >65                      | 33 (10.7)        | 20 (6.7)                         | 51 (26.3)                    | 33 (38.4)                     | 1 (8.3)            | 1 (1.2)     | 2 (66.7)                                      | 3 (21.4)                    | 5 (71.4)                  | 1 (20.0)                          | 15 (26.8)                  |
| Min age of ≥75                         | 0 (0.0)          | 1 (0.3)                          | 0 (0.0)                      | 0 (0.0)                       | 0 (0.0)            | 0 (0.0)     | 0 (0.0)                                       | 0 (0.0)                     | 0 (0.0)                   | 0 (0.0)                           | 0 (0.0)                    |
| Excludes ages >75                      | 105 (34.1)       | 54 (18.1)                        | 86 (44.3)                    | 48 (55.8)                     | 2 (16.7)           | 7 (8.3)     | 2 (66.7)                                      | 3 (21.4)                    | 5 (71.4)                  | 1 (20.0)                          | 20 (35.7)                  |
| Has DMC                                | n=308            | n=299                            | n=194                        | n=86                          | n=12               | n=84        | n=3                                           | n=14                        | n=7                       | n=5                               | n=56                       |
| No                                     | 151 (49.0)       | 151 (50.5)                       | 84 (43.3)                    | 37 (43.0)                     | 5 (41.7)           | 44 (52.4)   | 3 (100.0)                                     | 9 (64.3)                    | 3 (42.9)                  | 3 (60.0)                          | 28 (50.0)                  |
| Yes                                    | 118 (38.3)       | 113 (37.8)                       | 82 (42.3)                    | 39 (45.3)                     | 5 (41.7)           | 36 (42.9)   | 0 (0.0)                                       | 4 (28.6)                    | 4 (57.1)                  | 2 (40.0)                          | 23 (41.1)                  |
| Unknown                                | 39 (12.7)        | 35 (11.7)                        | 28 (14.4)                    | 10 (11.6)                     | 2 (16.7)           | 4 (4.8)     | 0 (0.0)                                       | 1 (7.1)                     | 0 (0.0)                   | 0 (0.0)                           | 5 (8.9)                    |

Unless otherwise noted, values are n (%). Columns are not mutually exclusive; a study may be counted in more than one column. Abbreviations: AKI, acute kidney infection; CKD, chronic kidney disease; DMC, data monitoring committee; ESRD, end-stage renal disease; max, maximum; min, minimum

<sup>a</sup>Other includes drug studies, pharmacokinetic studies, and studies with other interventions with renal endpoints. <sup>b</sup>Rows are not mutually exclusive.

**Table d. Funding source, number of centers, and locations**

| Trial attribute                            | CKD<br>N=308 | ESRD/CKD<br>on dialysis<br>N=299 | Renal<br>transplant<br>N=194 | Glomerular<br>disease<br>N=86 | Neoplastic<br>N=12 | AKI<br>N=84 | Metabolic/electrolyte<br>disorders<br>N=3 | Nephrolithiasis<br>N=14 | Pyelonephritis<br>N=7 | Care<br>delivery<br>models<br>N=5 | Other <sup>a</sup><br>N=56 |
|--------------------------------------------|--------------|----------------------------------|------------------------------|-------------------------------|--------------------|-------------|-------------------------------------------|-------------------------|-----------------------|-----------------------------------|----------------------------|
| Funding <sup>b</sup>                       | n=308        | n=299                            | n=194                        | n=86                          | n=12               | n=84        | n=3                                       | n=14                    | n=7                   | n=5                               | n=56                       |
| Industry                                   | 153 (49.7)   | 145 (48.5)                       | 94 (48.5)                    | 27 (31.4)                     | 3 (25.0)           | 17 (20.2)   | 1 (33.3)                                  | 7 (50.0)                | 3 (42.9)              | 0 (0.0)                           | 25 (44.6)                  |
| NIH                                        | 10 (3.2)     | 12 (4.0)                         | 6 (3.1)                      | 4 (4.7)                       | 0 (0.0)            | 1 (1.2)     | 0 (0.0)                                   | 0 (0.0)                 | 0 (0.0)               | 1 (20.0)                          | 1 (1.8)                    |
| Other                                      | 145 (47.1)   | 142 (47.5)                       | 94 (48.5)                    | 55 (64.0)                     | 9 (75.0)           | 66 (78.6)   | 2 (66.7)                                  | 7 (50.0)                | 4 (57.1)              | 4 (80.0)                          | 30 (53.6)                  |
| One sponsor or collaborator                | 210 (68.2)   | 214 (71.6)                       | 112 (57.7)                   | 57 (66.3)                     | 11 (91.7)          | 58 (69.0)   | 1 (33.3)                                  | 11 (78.6)               | 5 (71.4)              | 1 (20.0)                          | 40 (71.4)                  |
| Sponsor & number of centers classification | n=287        | n=280                            | n=187                        | n=81                          | n=12               | n=79        | n=3                                       | n=14                    | n=7                   | n=5                               | n=53                       |
| Industry funded - Single center            | 60 (20.9)    | 54 (19.3)                        | 41 (21.9)                    | 10 (12.3)                     | 1 (8.3)            | 9 (11.4)    | 0 (0.0)                                   | 2 (14.3)                | 1 (14.3)              | 0 (0.0)                           | 14 (26.4)                  |
| Industry funded - Multi-center             | 81 (28.2)    | 81 (28.9)                        | 49 (26.2)                    | 16 (19.8)                     | 2 (16.7)           | 7 (8.9)     | 1 (33.3)                                  | 5 (35.7)                | 2 (28.6)              | 0 (0.0)                           | 8 (15.1)                   |
| NIH funded - Single center                 | 7 (2.4)      | 5 (1.8)                          | 3 (1.6)                      | 1 (1.2)                       | 0 (0.0)            | 1 (1.3)     | 0 (0.0)                                   | 0 (0.0)                 | 0 (0.0)               | 1 (20.0)                          | 1 (1.9)                    |
| NIH funded - Multi-center                  | 2 (0.7)      | 6 (2.1)                          | 3 (1.6)                      | 3 (3.7)                       | 0 (0.0)            | 0 (0.0)     | 0 (0.0)                                   | 0 (0.0)                 | 0 (0.0)               | 0 (0.0)                           | 0 (0.0)                    |
| Other - Single center                      | 122 (42.5)   | 108 (38.6)                       | 79 (42.2)                    | 40 (49.4)                     | 7 (58.3)           | 53 (67.1)   | 2 (66.7)                                  | 5 (35.7)                | 3 (42.9)              | 4 (80.0)                          | 26 (49.1)                  |
| Other - Multi-center                       | 15 (5.2)     | 26 (9.3)                         | 12 (6.4)                     | 11 (13.6)                     | 2 (16.7)           | 9 (11.4)    | 0 (0.0)                                   | 2 (14.3)                | 1 (14.3)              | 0 (0.0)                           | 4 (7.5)                    |
| Location                                   | n=287        | n=280                            | n=187                        | n=81                          | n=12               | n=79        | n=3                                       | n=14                    | n=7                   | n=5                               | n=53                       |
| US only                                    | 127 (44.3)   | 90 (32.1)                        | 85 (45.5)                    | 18 (22.2)                     | 5 (41.7)           | 24 (30.4)   | 1 (33.3)                                  | 8 (57.1)                | 2 (28.6)              | 3 (60.0)                          | 19 (35.8)                  |
| Foreign only                               | 145 (50.5)   | 174 (62.1)                       | 94 (50.3)                    | 52 (64.2)                     | 7 (58.3)           | 55 (69.6)   | 1 (33.3)                                  | 5 (35.7)                | 4 (57.1)              | 2 (40.0)                          | 32 (60.4)                  |
| Both US and Foreign                        | 15 (5.2)     | 16 (5.7)                         | 8 (4.3)                      | 11 (13.6)                     | 0 (0.0)            | 0 (0.0)     | 1 (33.3)                                  | 1 (7.1)                 | 1 (14.3)              | 0 (0.0)                           | 2 (3.8)                    |

Unless otherwise noted, values are n (%). Columns are not mutually exclusive; a study may be counted in more than one column.

<sup>a</sup>Other includes drug studies, pharmacokinetic studies, and studies with other interventions with renal endpoints.

<sup>b</sup>Derived from lead sponsor and collaborator fields.

Abbreviations: AKI, acute kidney infection; CKD, chronic kidney disease; ESRD, end-stage renal disease; NIH, National Institutes of Health; US, United States.
