# Supplementary material
Source: PubMed Central journal article supplement (PMC3988265)

**Figure S1.** Sample size of clinical trials within nephrology.

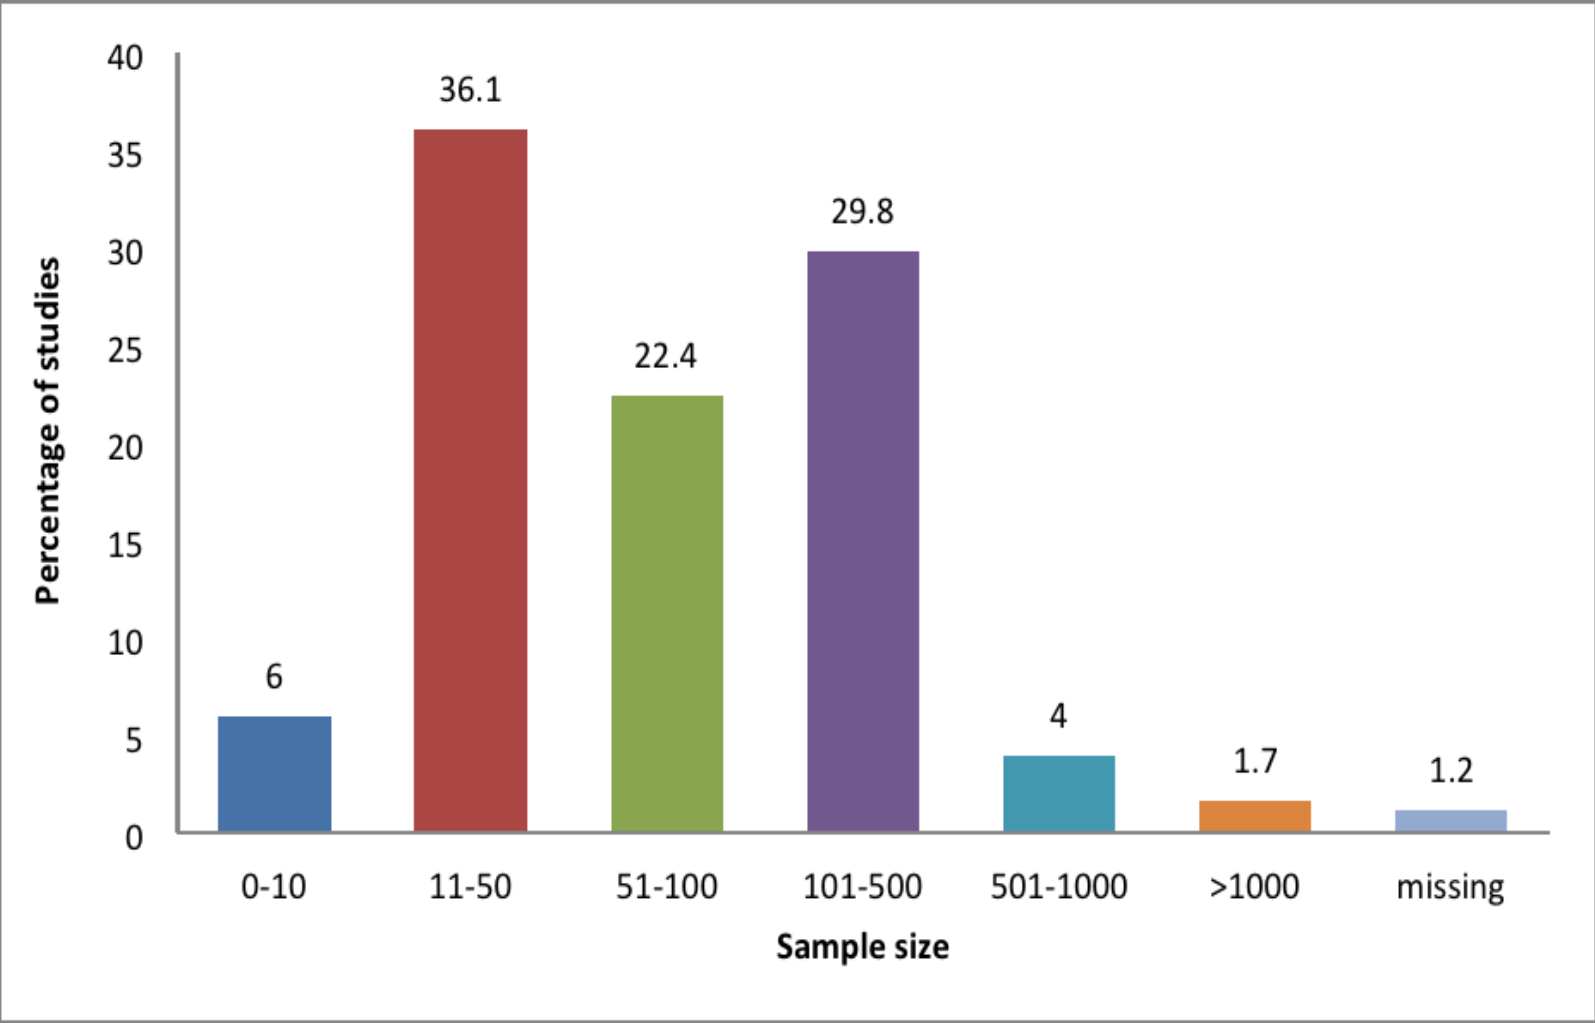

Supplement: NIHMS535436-supplement-01.pdf [file NIHMS535436-supplement-01.pdf]
